# Supplementary material for: Acid degradable poly(vinylcaprolactam)-based nanogels with ketal linkages for drug delivery
Source: Royal Society of Chemistry journal article supplement (doi:10.1039/c5tb00703h), 2015-01-01
Supplement: c5tb00703h1.pdf [file c5tb00703h1.pdf]

## Supporting Information

# Acid Degradable Poly(vinylcaprolactam)-based Nanogel with Ketal Linkage for Drug Delivery

*Yang Wang<sup>a,b</sup>, Jin Zheng<sup>a</sup>, Yefei Tian<sup>a</sup>, Wuli Yang<sup>a,\*</sup>*

<sup>a</sup> State Key Laboratory of Molecular Engineering of Polymers and Department of  
Macromolecular Science, Fudan University, Shanghai 200433, P.R. China

<sup>b</sup> Department of Biological and Chemical Engineering, Suzhou Chien-shiung Institute of  
Technology, Taicang 215411, Suzhou, People's Republic of China

\*E-mail: [wlyang@fudan.edu.cn](mailto:wlyang@fudan.edu.cn) (W. L. Yang)

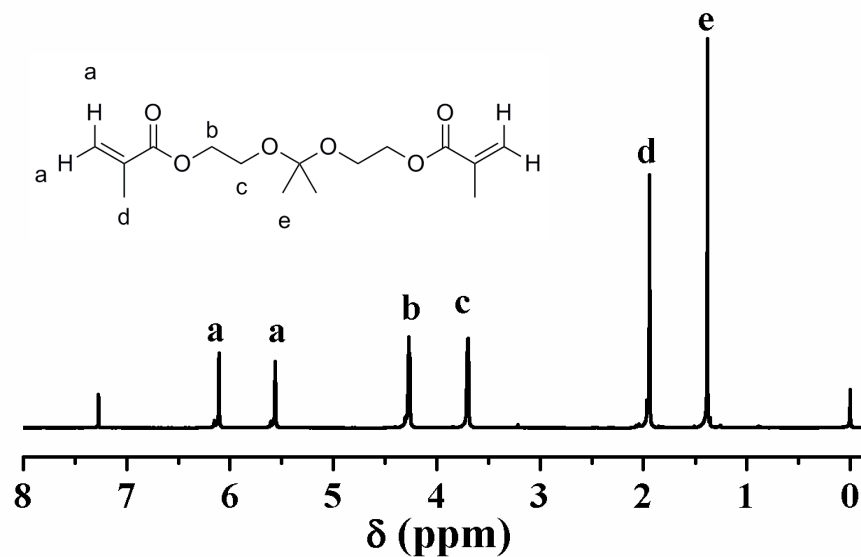

**Fig. S1**  $^1\text{H}$  NMR spectrum of DMAEP.  $^1\text{H}$  NMR (500 MHz,  $\text{CDCl}_3$ ):  $\delta$  (ppm) 1.38 (6H, s,  $(\text{COOCH}_2\text{CH}_2\text{O})_2\text{C}(\text{CH}_3)_2$ ), 1.94 (6H, s,  $(\text{OCOCCH}_3\text{CH}_2)_2$ ), 3.70 (4H, m,  $(\text{COOCH}_2\text{CH}_2\text{O})_2\text{C}(\text{CH}_3)_2$ ), 4.27 (4H, m,  $(\text{COOCH}_2\text{CH}_2\text{O})_2\text{C}(\text{CH}_3)_2$ ), 5.57 (2H, s,  $(\text{OCOCCH}_3\text{CH}_2)_2$  – syn to methyl), 6.11 (2H, s,  $(\text{OCOCCH}_3\text{CH}_2)_2$  – anti to methyl).

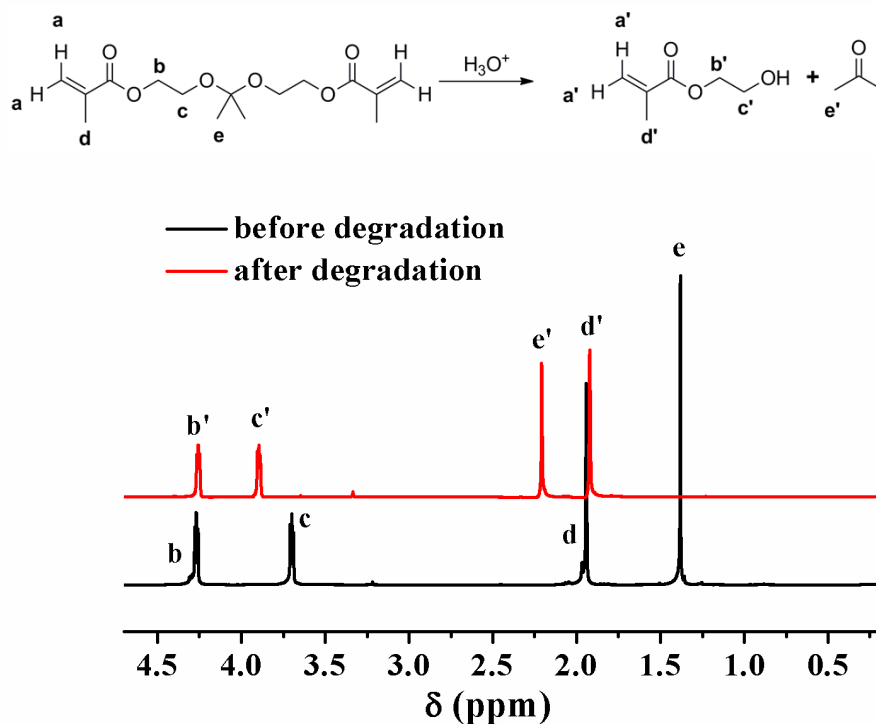

**Fig. S2**  $^1\text{H}$  NMR spectra of cross-linker DMAEP before and after degradation.

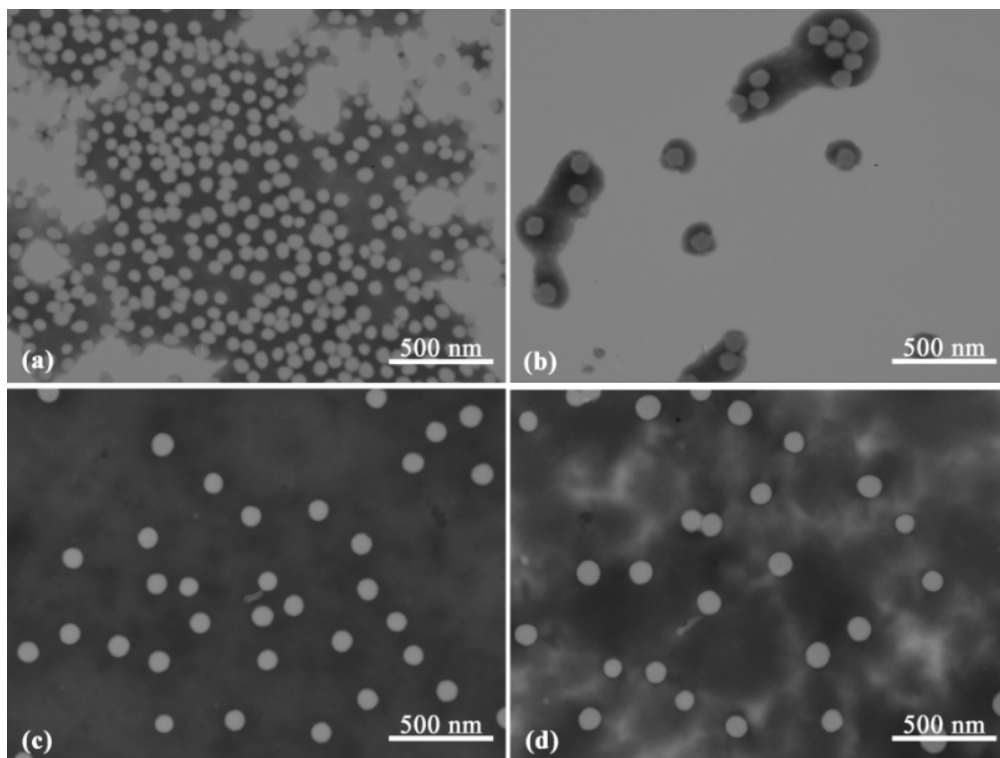

**Fig. S3** Representative TEM images ( $\times 5W$ ) of P(VCL-*ketal*-HPMA) nanogels with different HPMA contents: (a) 3 wt%, (b) 5 wt%, (c) 8 wt% and (d) 10 wt%.

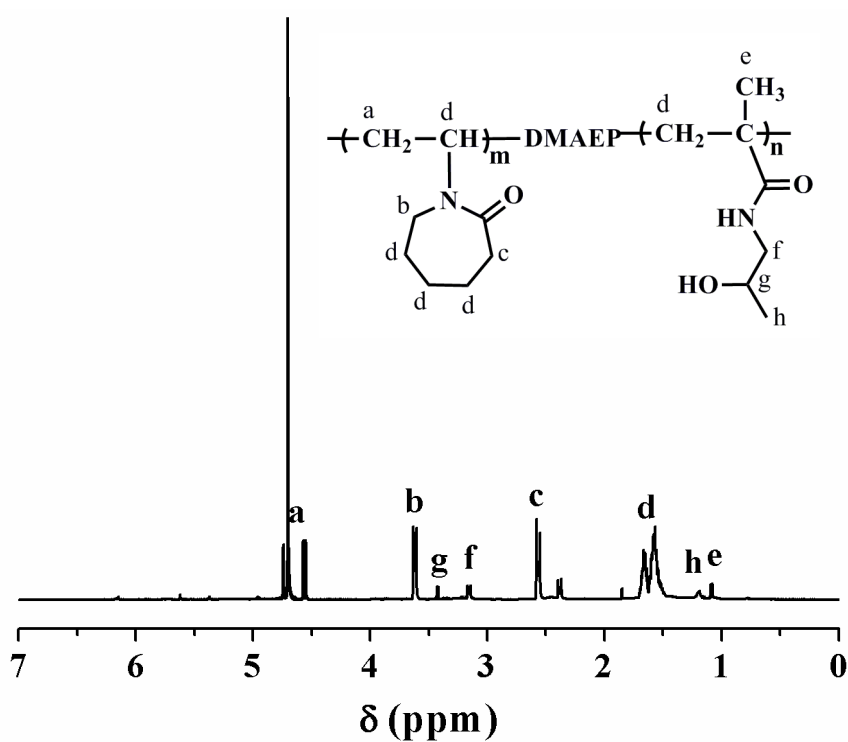

**Fig. S4**  $^1H$  NMR spectrum of P(VCL-*ketal*-HPMA) nanogel in  $D_2O$ .

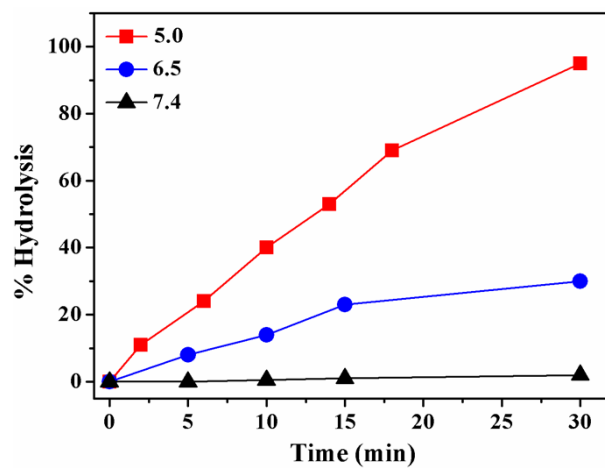

**Fig. S5** Hydrolysis kinetics of acid-cleavable cross-linker DMAEP at pH 5.0, 6.5 and 7.4, respectively.

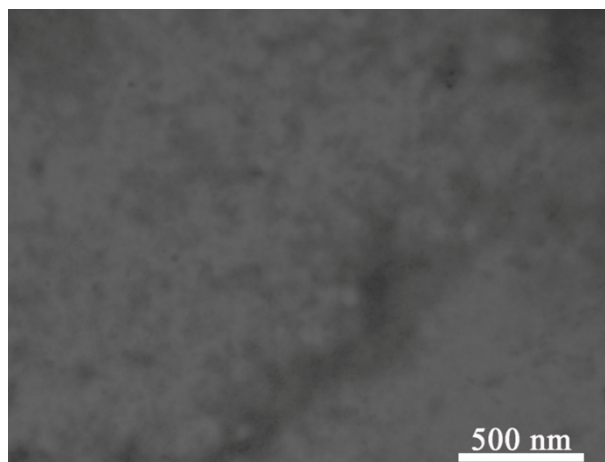

**Fig. S6** TEM image of P(VCL-*ketal*-HPMA-8) nanogels after degradation.

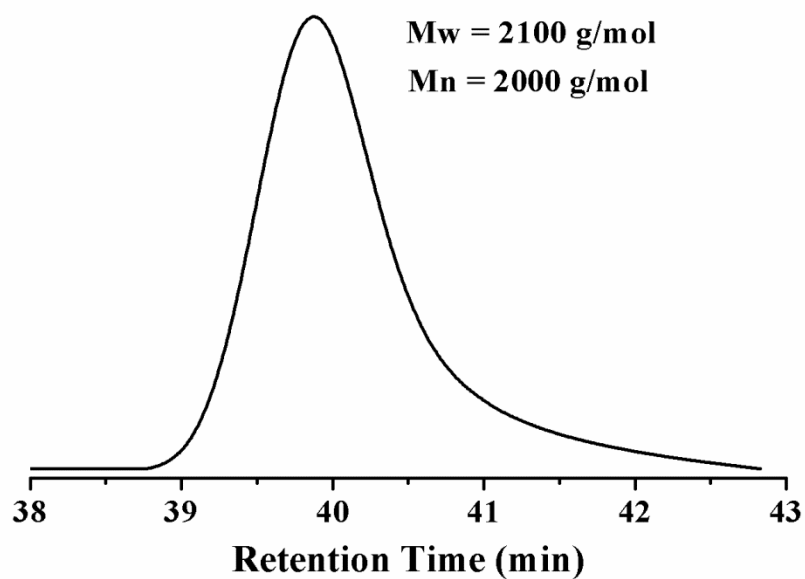

**Fig. S7** The molecular weight of copolymer P(VCL-*co*-HPMA) by GPC measurement.

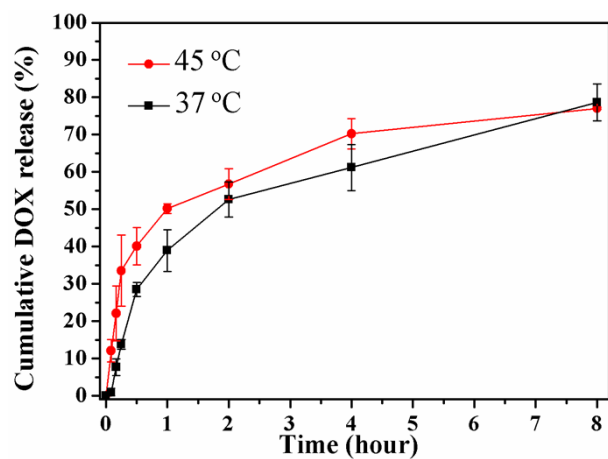

**Fig. S8** DOX release profiles of acid-degradable P(VCL-*ketal*-HPMA) nanogel in the medium of pH 5.0 at 37 °C and 45 °C .

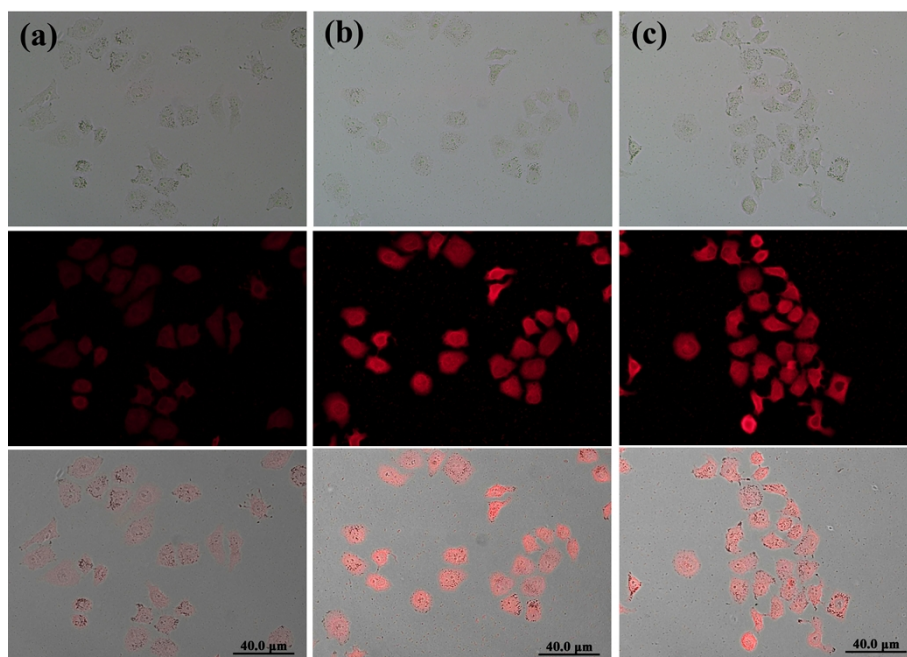

**Fig. S9** CLSM images of the intracellular DOX release of free DOX. (a) 2 h, (b) 6 h and (c) 12 h incubation of free DOX. In each column, images from top to down: differential interference contrast microscopy, fluorescence microscopy, and overlays of both images.

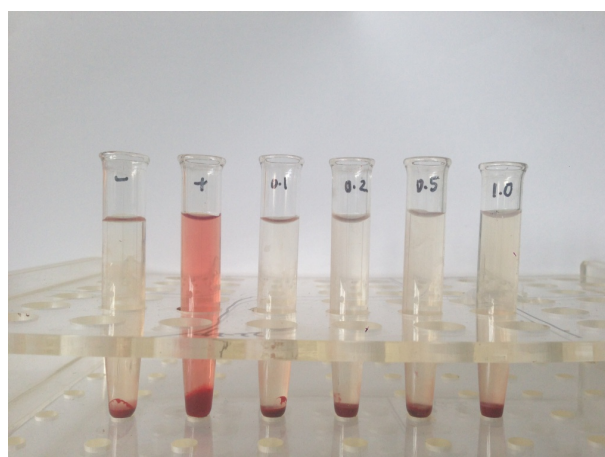

**Fig. S10** Hemolysis assay of the P(VCL-*ketal*-HPMA-8) nanogel. RBC suspension to make the final particle concentration 0.1, 0.2, 0.5 and 1 mg/mL, respectively. Distilled water served as positive control and normal saline as negative control.
